# Supplementary material
Source: PubMed Central journal article supplement (PMC4604418)
Supplement: AAC.01363-15_zac011154501so1.pdf [file AAC.01363-15_zac011154501so1.pdf]

## Supplemental material

**Table S1. PCR primers for screening of carbapenemase and  $\beta$ -lactamase genes in this study.**

| Type                  | Gene                              | Primers                                                                   | Length | Ref |
|-----------------------|-----------------------------------|---------------------------------------------------------------------------|--------|-----|
| <b>Carbapenemases</b> |                                   |                                                                           |        |     |
| CphA                  | <i>bla</i> <sub>CphA</sub>        | cphA 4-F: CATGGTCTATTTTCGGGGCCA<br>cphA 603-R: GCCTTGATCAGCTCTTCGTAGTGATC | 600    | 1   |
| BEL                   | <i>bla</i> <sub>BEL</sub>         | BEL-F: CGA CAA TGC CGC AGC TAA CC<br>BEL-R: CAG AAG CAA TTA ATA ACG CCC   | 449    | 2   |
| KPC                   | <i>bla</i> <sub>KPC</sub>         | KPC-F: ATGTCACTGTATCGCCGTC<br>KPC-R: TTA CTGCCCCGTTGACGCC                 | 902    | 3   |
| SME                   | <i>bla</i> <sub>SME</sub>         | SME-F1: GAGGAAGACTTTGATGGGAGGAT<br>SME-R1: TCCCCTCAGGACCGCCAAG            | 334    | 4   |
| IMI                   | <i>bla</i> <sub>IMI</sub>         | IMI-F: TGCGGTCGATTGGAGATAAA<br>IMI-R: CGATTCTTGAAGCTTCTGCG                | 399    | 4   |
| BIC                   | <i>bla</i> <sub>BIC</sub>         | BIC-F: TATGCAGCTCCTTTAAGGGC<br>BIC-R: TCATTGGCGGTGCCGTACAC                | 537    | 5   |
| IMP                   | <i>bla</i> <sub>IMP</sub>         | IMP-F: GTTTATGTTTCATACWTCG<br>IMP-R: GGTTTAAAYAAAACAACCAC                 | 432    | 6   |
| VIM                   | <i>bla</i> <sub>VIM</sub>         | VIM-F: TTTGGTTCGCATATCGCAACG<br>VIM-R: CCATTCAGCCAGATCGGCAT               | 500    | 6   |
| NDM                   | <i>bla</i> <sub>NDM</sub>         | NDM-F: ATGGAATTGCCCAATATTATGCAC<br>NDM-R: TCAGCGCAGCTTGTCGGC              | 813    | 7   |
| SPM                   | <i>bla</i> <sub>SPM</sub>         | SPM-F: AAAATCTGGGTACGCAAACG<br>SPM-R: ACATTATCCGCTGGAACAGG                | 271    | 5   |
| DIM                   | <i>bla</i> <sub>DIM</sub>         | DIM-F: GCTTGTCTTCGCTTGCTAACG<br>DIM-R: CGTTCGGCTGGATTGATTTG               | 699    | 5   |
| GIM                   | <i>bla</i> <sub>GIM</sub>         | GIM-F: TCGACACACCTTGGTCTGAA<br>GIM-R: AACTTCCAACCTTTGCCATGC               | 477    | 5   |
| SIM                   | <i>bla</i> <sub>SIM</sub>         | SIM-F: TACAAGGGATTTCGGCATCG<br>SIM-R: TAATGGCCTGTTCCCATGTG                | 570    | 5   |
| AIM                   | <i>bla</i> <sub>AIM</sub>         | AIM-F: CTGAAGGTGTACGGAAACAC<br>AIM-R: GTTCGGCCACCTCGAATTG                 | 322    | 5   |
| SMB                   | <i>bla</i> <sub>SMB</sub>         | SMB-F: CAGCAGCCATTACCATCTA<br>SMB-R: GAAGACCACGTCCTTGCACT                 | 492    | 8   |
| OXA                   | <i>bla</i> <sub>OXA-23-like</sub> | OXA-23-F: TCTGGTTGTACGGTTCAGC<br>OXA-23-R: AGTCTTTCCAAAAATTTTG            | 606    | 6   |
|                       | <i>bla</i> <sub>OXA-24-like</sub> | OXA-24-F: ATGAAAAAATTTATACTTCC<br>OXA-24-R: TTAAATGATTCCAAGATTTTC         |        | 6   |
|                       | <i>bla</i> <sub>OXA-48-like</sub> | OXA-48-F: TTGGTGGCATCGATTATCGG<br>OXA-48-R: GAGCACTTCTTTTGTGATGGC         | 744    | 9   |

|                                                        |                                      |                                                                     |     |    |
|--------------------------------------------------------|--------------------------------------|---------------------------------------------------------------------|-----|----|
|                                                        | <i>bla</i> <sub>OXA-58-like</sub>    | OXA-58-F: AAGTATTGGGGCTTGTGCTG<br>OXA-58-R: CCCCTCTGCGCTCTACATAC    | 599 | 10 |
|                                                        | <i>bla</i> <sub>OXA-143-like</sub>   | OXA-143-F: TGGCACTTTCAGCAGTTCCT<br>OXA-143-R: TAATCTTGAGGGGGCCAACC  | 149 | 11 |
|                                                        | <i>bla</i> <sub>OXA-235-like</sub>   | OXA-235-F: TTGTTGCCTTTACTTAGTTGC<br>OXA-235-R: CAAAATTTTAAGACGGATCG | 768 | 12 |
|                                                        | <i>bla</i> <sub>OXA-114</sub>        | OXA-114-F: CGCATCCTGTTCCAGCA<br>OXA-114-R: GTGCCGGTCTTGCCATAC       | 509 | 13 |
| <b>Extended-spectrum <math>\beta</math>-lactamases</b> |                                      |                                                                     |     |    |
| CTX-M                                                  | <i>bla</i> <sub>CTX-M</sub>          | CTX-M-F: TTTGCGATGTGCAGTACCAGTAA<br>CTX-M-R: CGATATCGTTGGTGGTGCCATA |     | 14 |
|                                                        | universal                            |                                                                     |     |    |
|                                                        | <i>bla</i> <sub>CTX-M-1</sub> group  | CTX-M-1GF: AAAAATCACTGCGCCAGTTC<br>CTX-M-1GR: AGCTTATTCATCGCCACGTT  | 415 | 15 |
|                                                        | <i>bla</i> <sub>CTX-M-2</sub> group  | CTX-M-2GF: CGACGCTACCCCTGCTATT<br>CTX-M-2GR: CCAGCGTCAGATTTTTCAGG   | 552 | 15 |
|                                                        | <i>bla</i> <sub>CTX-M-8</sub> group  | CTX-M-8GF: TCGCGTTAAGCGGATGATGC<br>CTX-M-8GR: AACCCACGATGTGGGTAGC   | 666 | 15 |
|                                                        | <i>bla</i> <sub>CTX-M-9</sub> group  | CTX-M-9GF: CAAAGAGAGTGCAACGGATG<br>CTX-M-9GR: ATTGGAAAGCGTTCATCACC  | 205 | 15 |
|                                                        | <i>bla</i> <sub>CTX-M-25</sub> group | CTX-M-25GF: GCACGATGACATTCGGG<br>CTX-M-25GR: AACCCACGATGTGGGTAGC    | 327 | 15 |
| DHA                                                    | <i>bla</i> <sub>DHA</sub>            | DHA-F: AACTTTCACAGGTGTGCTGGGT<br>DHA-R: CCGTACGCATACTGGCTTTGC       | 405 | 16 |
| FOX-5                                                  | <i>bla</i> <sub>FOX</sub>            | FOX-F: ATGCCAATTCATTCACCAC<br>FOX-R: ATKTTGGAMGCCTTGAACCTCG         |     | 17 |
| AmpC                                                   | <i>bla</i> <sub>AmpC</sub>           | AmpC-F: ATCAAAACTGGCAGCCG<br>AmpC-R: GAGCCCGTTTTATGGACCCA           | 170 | 18 |
| TEM                                                    | <i>bla</i> <sub>TEM</sub>            | TEM-F: ATGAGTATTCAACATTTCCGTG<br>TEM-R: TTACCAATGCTTAATCAGTGAG      | 861 | 14 |
| SHV                                                    | <i>bla</i> <sub>SHV</sub>            | SHV-F: ATTTGTCGCTTCTTTACTCGC<br>SHV-R: TTTATGGCGTTACCTTTGACC        |     | 14 |
| GES                                                    | <i>bla</i> <sub>GES</sub>            | GES-ESBL-F: AGTCGGCTAGACCGGAAAG<br>GES-ESBL-R: TTTGTCCGTGCTCAGGAT   | 399 | 19 |
| PER                                                    | <i>bla</i> <sub>PER</sub>            | PER-F: ATGAATGTCATTATAAAAG<br>PER-R: TTGGGCTTAGGGCAG                | 927 | 6  |
| PSE                                                    | <i>bla</i> <sub>PSE</sub>            | PSE-F: AATGGCAATCAGCGCTTCCC<br>PSE-R: GGGGCTTGATGCTCACTCCA          | 586 | 20 |
| VEB                                                    | <i>bla</i> <sub>VEB</sub>            | VEB-F: CATTTCCCGATGCAAAGCGT<br>VEB-R: CGAAGTTTCTTTGGACTCTG          | 648 | 19 |
| OXA                                                    | <i>bla</i> <sub>OXA-1</sub> group    | OXA-1-F: GGCACCAGATTCAACTTTCAAG<br>OXA-1-R: GACCCCAAGTTTCCTGTAAGTG  | 564 | 19 |

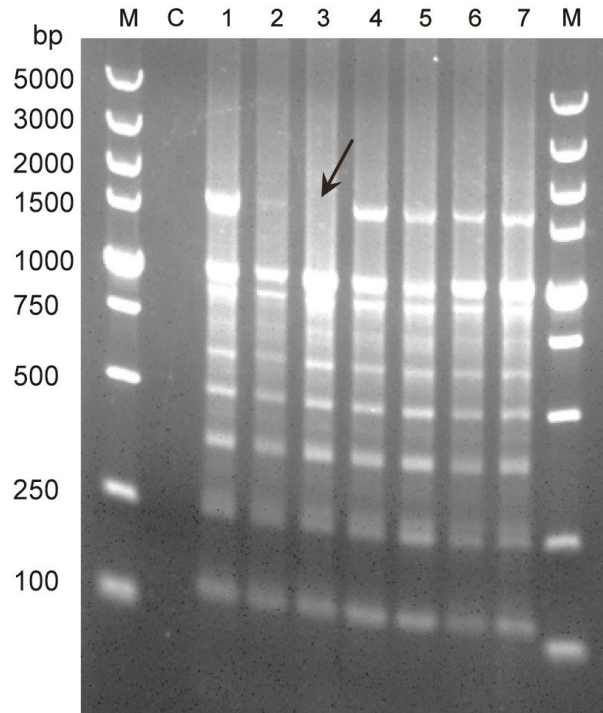

**Figure S1.** ERIC-PCR fingerprint pattern of seven clinical isolates. M, molecular marker; C, negative control; Lane1, Ro25687; lane2, Ro25277; lane3, Ro24724; lane 4, Ro24522; lane 5, Ro24362; lane 6, Ro24005; lane 7, Ro23980A. The arrow shows the band only absent from strain Ro24724.

## References

1. Adler A, Assous MV, Paikin S et al. Emergence of VIM-producing *Aeromonas caviae* in Israeli hospitals. *The Journal of antimicrobial chemotherapy* 2014; **69**: 1211-4.
2. Bogaerts P, Bauraing C, Deplano A et al. Emergence and dissemination of BEL-1-producing *Pseudomonas aeruginosa* isolates in Belgium. *Antimicrobial agents and chemotherapy* 2007; **51**: 1584-5.
3. Endimiani A, Carias LL, Hujer AM et al. Presence of plasmid-mediated quinolone resistance in *Klebsiella pneumoniae* isolates possessing blaKPC in the United States. *Antimicrobial agents and chemotherapy* 2008; **52**: 2680-2.
4. Hong SS, Kim K, Huh JY et al. Multiplex PCR for rapid detection of genes encoding class A carbapenemases. *Annals of laboratory medicine* 2012; **32**: 359-61.
5. Poirel L, Walsh TR, Cuvillier V et al. Multiplex PCR for detection of acquired carbapenemase genes. *Diagn Microbiol Infect Dis* 2011; **70**: 119-23.
6. Hujer KM, Hujer AM, Hulten EA et al. Analysis of antibiotic resistance genes in multidrug-resistant *Acinetobacter* sp. isolates from military and civilian patients treated at the Walter Reed Army Medical Center. *Antimicrobial agents and chemotherapy* 2006; **50**: 4114-23.
7. Shaheen BW, Nayak R, Boothe DM. Emergence of a New Delhi metallo-beta-lactamase (NDM-1)-encoding gene in clinical *Escherichia coli* isolates recovered from companion animals in the United States. *Antimicrobial agents and chemotherapy* 2013; **57**: 2902-3.
8. Wachino J, Yoshida H, Yamane K et al. SMB-1, a novel subclass B3 metallo-beta-lactamase, associated with ISCR1 and a class 1 integron, from a carbapenem-resistant *Serratia marcescens* clinical isolate. *Antimicrob Agents Chemother* 2011; **55**: 5143-9.
9. Poirel L, Potron A, Nordmann P. OXA-48-like carbapenemases: the phantom menace. *The Journal of antimicrobial chemotherapy* 2012; **67**: 1597-606.
10. Evans BA, Hamouda A, Towner KJ et al. Novel genetic context of multiple bla OXA-58 genes in *Acinetobacter* genospecies 3. *The Journal of antimicrobial chemotherapy* 2010; **65**: 1586-8.
11. Higgins PG, Lehmann M, Seifert H. Inclusion of OXA-143 primers in a multiplex polymerase chain reaction (PCR) for genes encoding prevalent OXA carbapenemases in *Acinetobacter* spp. *International journal of antimicrobial agents* 2010; **35**: 305.
12. Higgins PG, Perez-Llarena FJ, Zander E et al. OXA-235, a novel class D beta-lactamase involved in resistance to carbapenems in *Acinetobacter baumannii*. *Antimicrobial agents and chemotherapy* 2013; **57**: 2121-6.
13. Turton JF, Mustafa N, Shah J et al. Identification of *Achromobacter xylosoxidans* by detection of the bla(OXA-114-like) gene intrinsic in this species. *Diagnostic microbiology and infectious disease* 2011; **70**: 408-11.
14. Adams-Haduch JM, Paterson DL, Sidjabat HE et al. Genetic basis of multidrug resistance in *Acinetobacter baumannii* clinical isolates at a tertiary medical center in Pennsylvania. *Antimicrobial agents and chemotherapy* 2008; **52**: 3837-43.
15. Woodford N, Fagan EJ, Ellington MJ. Multiplex PCR for rapid detection of genes encoding CTX-M extended-spectrum (beta)-lactamases. *J Antimicrob Chemother* 2006; **57**: 154-5.
16. Barguigua A, El Otmani F, Talmi M et al. Prevalence and genotypic analysis of plasmid-mediated beta-lactamases among urinary *Klebsiella pneumoniae* isolates in Moroccan community. *The Journal of antibiotics* 2013; **66**: 11-6.

17. Alvarez M, Tran JH, Chow N et al. Epidemiology of conjugative plasmid-mediated AmpC beta-lactamases in the United States. *Antimicrobial agents and chemotherapy* 2004; **48**: 533-7.
18. Paterson DL, Hujer KM, Hujer AM et al. Extended-spectrum beta-lactamases in *Klebsiella pneumoniae* bloodstream isolates from seven countries: dominance and widespread prevalence of SHV- and CTX-M-type beta-lactamases. *Antimicrobial agents and chemotherapy* 2003; **47**: 3554-60.
19. Dallenne C, Da Costa A, Decre D et al. Development of a set of multiplex PCR assays for the detection of genes encoding important beta-lactamases in Enterobacteriaceae. *J Antimicrob Chemother* 2010; **65**: 490-5.
20. Cabrera R, Ruiz J, Marco F et al. Mechanism of resistance to several antimicrobial agents in *Salmonella* Clinical isolates causing traveler's diarrhea. *Antimicrobial agents and chemotherapy* 2004; **48**: 3934-9.
